# Supplementary material
Source: PubMed Central journal article supplement (PMC4151187)
Supplement: NIHMS601936-supplement-01.pdf [file NIHMS601936-supplement-01.pdf]

## **Supplementary Materials: Electronic Annex**

Surficial weathering of iron sulfide mine tailings under semi-arid climate

Sarah M. Hayes, Robert A. Root, Nicolas Perdrial, Raina Maier and Jon Chorover\*

Department of Soil, Water and Environmental Science,

University of Arizona, Tucson, AZ 85721

Submitted to:

*Geochimica et Cosmochimica Acta*

\* Address correspondence to Jon Chorover, Department of Soil, Water and Environmental Science, University of Arizona, 1177 E 4<sup>th</sup> St, Shantz 429, Tucson, AZ 85721

Telephone: +1 520-626-5635, Fax: 520-626-1647, E-mail: chorover@cals.arizona.edu

Pages: 16

**SM Table 1:** Reference minerals used in NEXAFS and XANES linear combination fits

**SM Table 2:** Minerals and formula for sulfur reference library, spectra in SM Fig. 3

**SM Table 3:** Minerals and formula for iron reference library, spectra in SM Fig.4

**SM Table 4:** Thermodynamic constants and mode conditions for Eh pH diagram

**SM Figure 1:** Petrographic images of all samples

**SM Figure 2:** Additional information for as-collected samples.

**SM Figure 3:** Reference minerals used in S XANES linear combination fits

**SM Figure 4:** Reference minerals used in Fe XANES linear combination fits

**SM Figure 5:** First-derivative Fe- XANES fits for SSE samples

## Sequential Extraction Procedure

The SSE procedure was modified after Dold (2003) and Neaman et al. (2004) and performed as follows: 1) deionized water ( $H_2O$ ), 1 h at room temperature ( $25^{\circ}C$ , RT), targeting soluble efflorescent salts, e.g. gypsum; 2) 1 M ammonium nitrate, 2h at RT with a DI wash targeting easily exchangeable and plant/bioavailable ions and metals; 3) 1M ammonium acetate with pH adjusted to 4.5 with acetic acid and a DI wash, targeting non-specifically sorbed ions and acid soluble carbonates; 4) 1.0M ammonium phosphate, 24 hr with pH adjusted to 5.0 with acetic acid and a DI wash, targeting specifically sorbed ligands, e.g. inner sphere As complexed on ferric (hydr)oxide surface sites; 5) 0.1 M ascorbic acid plus 0.2 M ammonium oxalate, 2 h in the dark at pH 3.0 adjusted with oxalic acid with an acetic acid wash to dissolve precipitated oxalates, targeting poorly crystalline Al, Mn, and Fe (oxyhydr)oxides, including ferrihydrite and schwertmannite; and 6) 1 M citrate-dithionite-bicarbonate with an acetic acid wash, targeting reducible crystalline Al, Mn, and Fe (oxyhydr)oxides and (hydroxy)sulfates, including goethite and jarosite. Sediment aliquots were sequentially treated with each extractant solution (solid: solution = 1:40 by mass), the suspensions were centrifuged (25 min at 11 000 g), and the supernatant was decanted and filtered ( $0.45\ \mu m$  nylon membrane filters). Between extraction steps, sediments were washed with 10 mL of deionized water ( $18.2\ M\Omega\text{-cm}$ ), centrifuged, and the supernatant decanted. The filtrate from each extraction step was analyzed by ICP-MS. After these extractions were performed, the residual solids underwent elemental analysis after dissolution using lithium metaborate/tetraborate fusion with inductively coupled plasma optical emission mass spectrometry (ICP-OES). Averages are reported from extractions run in triplicate and compared to total

concentrations from the total digestion of a split sample described above. Samples were sacrificed at each step in the SSE and frozen prior for analysis by x-ray diffraction (XRD) and Fe- XANES analysis.

### **Petrographic Analysis**

A split subsample of the <2 mm fraction was air dried under 5% H<sub>2</sub>/95% N<sub>2</sub> and embedded using degassed ultra-clean low-temperature set epoxy (EpoTek 301™). Uniform 30 μm thin sections were cut and ground under an anaerobic environment (Spectrum Petrographics Vancouver, WA). The epoxy-impregnated 30 μm thin sections were bonded to arsenic free quartz slides using cyanoacrylate adhesive (Superglue™). Each thin section was examined with a reflected and cross polarized light microscope. Distinct textural zones and grains of quartz and oxidized v. sulfide grains with and without oxidized rinds were identified in terms of color and morphology (reflected light). Petrographic analysis would have been complicated due to fine grain-size and poorly crystalline nature of the tailings. Electron and synchrotron microprobe (EMPA and u-XRF, respectively) were utilized to further characterize the petrology and elemental associations of the samples. For EMPA, thin sections were carbon coated and analyzed at the Lunar and Planetary Laboratory at the University of Arizona (CAMECA SX100 with WDS), operated at a 15 keV and a beam current of 9.77 nA and a spot size of about 2 μm. Synchrotron x-ray micro fluorescence (μ-XRF) was performed at SSRL. Thin sections further interrogated by micro-focused XRF maps and XAS spectra at the Stanford Synchrotron Radiation Lightsource (SSRL) at 13000 eV and 13050 eV (to differentiate As K-α from Pb L-III) using Si(111) crystal and a Vortex single element

detector (SII Nano Technology, Northridge, CA) at beam lines 10-2 and 2-3 with a spot size of 30  $\mu\text{m}$  and 2  $\mu\text{m}$ , respectively.

### **SSE Fe-XANES Analysis**

The SSE-XANES spectra can be used to constrain model fits for complex and heterogeneous natural samples by uncovering phases that would otherwise be overlain and convoluted, making them potentially more difficult to identify. SSE-XANES, as used here without weight adjusted amplitude correction can be used to constrain and identify possible phases, but not the fractional component, used in linear combination fits after targeted phases are dissolved. The method is similar to differential x-ray diffraction can elucidate mineral Bragg reflections lost or gained as a function of reaction in a series of sequential extractions (Dold, 2003; Caraballo et al., 2009). Splits from the IK composite SSE series were examined before and after each SSE by Fe XANES. Examination of the residual revealed isolated phases as well as phases extracted and were used to guide the selection of component models in fits for the pit samples..

### **Geochemical Modeling**

Equilibrium activity diagrams depicting theoretical stability relations among solid phases and aqueous species were computed with the ACT2 program in GWB. Precipitation of the thermodynamically stable phases of hematite, goethite, and magnetite was suppressed in the model to show the metastable phases of ferrihydrite, schwertmannite, and jarosite. Modified database from the LLNL dataset

thermo.com.V8.R6+ (Delany and Lundeen, 1990). There are disagreements in the literature on ferrihydrite structure (Waychunas et al., 1993; Zhao et al., 1994; Manceau and Gates, 1997; Janney et al., 2000; Michel et al., 2007), and solubility products (e.g.  $\log K_{sp} = 3.0$  to  $5.66$ ; Delany and Lundeen, 1990; Majzlan et al., 2004).

**SM Table 1:** Reference minerals used in NEXAFS and XANES linear combination fits

| Mineral               | Formula                                                                                                                         | Source <sup>a</sup> | Lot/ locality           | Published           |
|-----------------------|---------------------------------------------------------------------------------------------------------------------------------|---------------------|-------------------------|---------------------|
| ankerite <sup>b</sup> | $\text{Ca}(\text{Fe}_{0.68}, \text{Mg}_{0.32})(\text{CO}_3)_2$                                                                  | Natural             | Pulaski Co.,<br>AR, USA | This study          |
| chlorite              | $(\text{Mg}, \text{Fe})_5\text{Al}(\text{Si}_3\text{Al})\text{O}_{10}(\text{OH})_8$                                             | CMR                 | CCa-2                   | O'Day et al., 2004  |
| ferrihydrite          | $\text{Fe}_2\text{O}_3 \cdot 2\text{FeOOH} \cdot 2.6\text{H}_2\text{O}$<br>or $\text{Fe}_2\text{O}_3 \cdot n\text{H}_2\text{O}$ | Syn.                | na                      | Gao et al., 2013    |
| gypsum                | $\text{CaSO}_4 \cdot 2\text{H}_2\text{O}$                                                                                       | Wards               | Alberta,<br>Canada      | This study          |
| plumbojarosite        | $\text{PbFe}_6(\text{SO}_4)_4(\text{OH})_{12}$                                                                                  | UAM                 | 5751                    | Hayes et al., 2009  |
| pyrite                | $\text{FeS}_2$                                                                                                                  | Natural             | unknown                 | O'Day et al., 2004  |
| schwertmannite        | $\text{Fe}_8\text{O}_8(\text{OH})_6(\text{SO}_4)$                                                                               | Syn.                | na                      | Bigham et al., 1990 |
| melanterite           | $\text{Fe}(\text{SO}_4) \cdot 7\text{H}_2\text{O}$                                                                              | EM                  | unknown                 | This study          |

<sup>a</sup> Source identifications are CMR – clay minerals repository, Wards – Wards Scientific Inc., UAM – University of Arizona Mineral Museum, Syn. – Synthetic, and EM – Excalibur Mineral.

<sup>b</sup> Verified with XRD (PDF# 01-083-1531), ferrous content not quantified, stoichiometry from reference mineral.

**SM Table 2:** Minerals and formula for sulfur reference library, spectra in SM Fig. 3

Sulfates

|                    |                                                                                      |
|--------------------|--------------------------------------------------------------------------------------|
| gypsum             | $\text{CaSO}_4 \cdot 2\text{H}_2\text{O}$                                            |
| Iron (II) sulfate  | $\text{FeSO}_4$                                                                      |
| goslarite          | $\text{ZnSO}_4 \cdot 7\text{H}_2\text{O}$                                            |
| plumbojarosite     | $\text{Pb}(\text{Fe}_3(\text{SO}_4)_2(\text{OH})_6)_2$                               |
| sodium sulfate     | $\text{Na}_2\text{SO}_4$                                                             |
| thaumasite         | $\text{Ca}_3\text{SO}_4\text{Si}(\text{OH})_6\text{CO}_3 \cdot 12\text{H}_2\text{O}$ |
| iron (III) sulfate | $\text{Fe}_2(\text{SO}_4)_3$                                                         |
| mercury sulfate    | $\text{HgSO}_4$                                                                      |
| anglesite          | $\text{PbSO}_4$                                                                      |

Intermediates

|                         |                                              |
|-------------------------|----------------------------------------------|
| sodium sulfite          | $\text{Na}_2\text{SO}_3$                     |
| potassium sulfite       | $\text{K}_2\text{SO}_3$                      |
| methionine              | $\text{C}_5\text{H}_{11}\text{NO}_2\text{S}$ |
| cysteine                | $\text{C}_3\text{H}_7\text{NO}_2\text{S}$    |
| potassium tetrathionate | $\text{K}_2\text{S}_4\text{O}_6$             |
| sodium thiosulfate      | $\text{Na}_2\text{S}_2\text{O}_3$            |
| potassium thiosulfate   | $\text{K}_2\text{S}_2\text{O}_3$             |
| elemental sulfur        | S                                            |

Sulfides

|                   |                                |
|-------------------|--------------------------------|
| pyrite            | $\text{FeS}_2$                 |
| marcasite         | $\text{FeS}_2$                 |
| Iron (II) sulfide | $\text{FeS}$                   |
| troilite          | $\text{FeS}$                   |
| arsenopyrite      | $\text{FeAsS}$                 |
| sphalerite        | $\text{ZnS}$                   |
| cinnabar          | $\text{HgS}$                   |
| metacinnabar      | $\text{HgS}$                   |
| realgar           | $\alpha\text{-As}_4\text{S}_4$ |
| orpiment          | $\text{As}_2\text{S}_3$        |

**SM Table 3:** Minerals and formula for iron reference library, spectra in SM Fig.4

Carboante/Sulfide (ferrous)

|                              |                                                             |
|------------------------------|-------------------------------------------------------------|
| 1. Siderite                  | $\text{Fe}^{\text{II}}\text{CO}_3$                          |
| 2. Ankerite                  | $\text{Ca}(\text{Fe}^{\text{II}},\text{Mg})(\text{CO}_3)_2$ |
| 3. Pyrite <sup>a</sup>       | $\text{Fe}^{\text{II}}\text{S}_2$                           |
| 4. Arsenopyrite <sup>b</sup> | $\text{Fe}^{\text{II}}\text{AsS}$                           |

Hydroxide (ferric/mixed)

|                           |                                                                                                                                                                                     |
|---------------------------|-------------------------------------------------------------------------------------------------------------------------------------------------------------------------------------|
| 5. Ferrihydrite           | $\text{Fe}^{\text{III}}(\text{OH})_3$ - shorthand<br>$5\text{Fe}_2\text{O}_3 \cdot 9\text{H}_2\text{O}$ - IMA '73<br>$\text{Fe}_{10}\text{O}_{14}(\text{OH})_2$ - Michel et al. '10 |
| 6. Goethite <sup>a</sup>  | $\alpha\text{-Fe}^{\text{III}}\text{OOH}$                                                                                                                                           |
| 7. Maghemite              | $\gamma\text{-Fe}_2^{\text{III}}\text{O}_3$                                                                                                                                         |
| 8. Hematite <sup>a</sup>  | $\alpha\text{-Fe}_2^{\text{III}}\text{O}_3$                                                                                                                                         |
| 9. Magnetite <sup>a</sup> | $\text{Fe}^{\text{II}}\text{Fe}_2^{\text{III}}\text{O}_4$                                                                                                                           |

Sulfate (ferrous/ferric/mixed)

|                                             |                                                                                                       |
|---------------------------------------------|-------------------------------------------------------------------------------------------------------|
| 10. Melanterite                             | $\text{Fe}^{\text{II}}\text{SO}_4$                                                                    |
| 11. Plumbojarosite <sup>c</sup>             | $\text{Pb}^{\text{II}}\text{Fe}_6^{\text{III}}(\text{SO}_4)_4(\text{OH})_{12}$                        |
| 12. Jarosite                                | $\text{KFe}_3^{\text{III}}(\text{SO}_4)_2(\text{OH})_6$                                               |
| 13. Schwertmannite                          | $\text{Fe}_{16}^{\text{III}}\text{O}_{16}(\text{OH})_{12}(\text{SO}_4)_2$                             |
| 14. Greenrust II $\text{SO}_4$ <sup>b</sup> | $\text{Fe}_4^{\text{II}}\text{Fe}_2^{\text{III}}(\text{OH})_2(\text{SO}_4) \cdot 6\text{H}_2\text{O}$ |

Arsenate/Phosphate/Silicate (ferrous/mixed)

|                           |                                                                                                                                          |
|---------------------------|------------------------------------------------------------------------------------------------------------------------------------------|
| 15. Scorodite             | $\text{Fe}^{\text{II}}\text{AsO}_4 \cdot 2\text{H}_2\text{O}$                                                                            |
| 16. Parasymplesite        | $\text{Fe}_3^{\text{II}}(\text{AsO}_4)_2 \cdot 8\text{H}_2\text{O}$                                                                      |
| 17. Vivianite             | $\text{Fe}_3^{\text{II}}(\text{PO}_4)_2 \cdot 8\text{H}_2\text{O}$                                                                       |
| 18. Angelellite           | $\text{Fe}_4^{\text{III}}(\text{AsO}_4)_2\text{O}_3$                                                                                     |
| 19. Chlorite <sup>a</sup> | $(\text{Mg}_{5.5}\text{Fe}_3^{\text{II}}\text{Fe}^{\text{III}}\text{Al}_{2.5})[\text{Si}_5\text{Al}_{2.5}\text{O}_{20}](\text{OH})_{16}$ |

Previously published: <sup>a</sup> O'Day et al., 2004; <sup>b</sup> Root et al., 2009; <sup>c</sup> Hayes et al., 2009



**SM Table 4:** Thermodynamic constants and mode conditions for Eh pH diagram

|                                                                                                                                                             |                       |
|-------------------------------------------------------------------------------------------------------------------------------------------------------------|-----------------------|
| Iron solid                                                                                                                                                  | log K                 |
| Jarosite [Fe <sub>3</sub> (SO <sub>4</sub> ) <sub>2</sub> (OH) <sub>6</sub> ]                                                                               | 9.37 <sup>a</sup>     |
| $3\text{Fe}^{3+} + 2\text{SO}_4^{2-} + \text{K}^+ + 6\text{H}_2\text{O} \leftrightarrow \text{Fe}_3(\text{SO}_4)_2(\text{OH})_6 + 6\text{H}^+$              |                       |
| Schwertmannite [Fe <sub>8</sub> O <sub>8</sub> (OH) <sub>4.8</sub> (SO <sub>4</sub> ) <sub>1.6</sub> ]                                                      | 17.4 <sup>b</sup>     |
| $8\text{Fe}^{3+} + 12.8\text{H}_2\text{O} + 1.6\text{SO}_4^{2-} \leftrightarrow \text{Fe}_8\text{O}_8(\text{OH})_{4.8}(\text{SO}_4)_{1.6} + 20.8\text{H}^+$ |                       |
| Ferrihydrite [Fe(OH) <sub>3</sub> ]                                                                                                                         |                       |
| $\text{Fe}^{3+} + \text{H}_2\text{O} \leftrightarrow \text{Fe}(\text{OH})_3 + 3\text{H}^+$                                                                  |                       |
|                                                                                                                                                             | -3.0 <sup>c</sup>     |
| $\text{Fe}^{3+} + \text{H}_2\text{O} \leftrightarrow \text{Fe}(\text{OH})_3 + 3\text{H}^+$                                                                  |                       |
|                                                                                                                                                             | -5.56 <sup>a</sup>    |
| Pyrite [FeS <sub>2</sub> ]                                                                                                                                  | -24.65 <sup>a,d</sup> |
| $\text{Fe}^{2+} + 0.25\text{SO}_4^{2-} + 1.75\text{HS}^- + 0.25\text{H}^+ \leftrightarrow \text{FeS}_2 + \text{H}_2\text{O}$                                |                       |

---

<sup>a</sup> Delaney and Lundeen, 1990; <sup>b</sup> Bigham et al., 1996; <sup>c</sup> Majzlan et al, 2004; <sup>d</sup> Lundeen, 1990

## **SM Figure Captions**

**SM Figure 1.** Petrographic images of all samples. Images from reflected light, cross polarized light and x-ray fluorescence (13000 & 13050eV) from 30  $\mu\text{m}$  thin sections for each depth (A-G) from the IK mine tailings.

**SM Figure 2.** Additional information for as-collected samples. Isolated grains were examined based on color and morphology. Panels A-C show the three distinct aggregates observed in the surface tailings, identified as Tan, Maroon and Blue. The tailings pile observed from the buildings labeled in Fig. 1 with a view to the west toward the pit on top of the pile. Panel D shows the color changes observed in the fresh pit.

**SM Figure 3.** Reference minerals used in S XANES linear combination fits

**SM Figure 4.** Reference minerals used in Fe XANES linear combination fits. Red spectra labels indicate spectra that have been published previously (Hayes et al., 2009; O'Day et al., 2004).

**SM Figure 5.** First-derivative Fe- XANES fits for SSE samples.

## References to Electronic Annex

- Bigham J. M., Schwertmann U., Carlson L., Murad E. (1990) A Poorly Crystallized Oxyhydroxysulfate of Iron Formed by Bacterial Oxidation of Fe(ii) in Acid-Mine Waters. *Geochim. Cosmochim. Acta* **54**, 2743-2758.
- Bigham JM, Schwertmann U, Traina SJ, Winland RL, Wolf M. (1996) Schwertmannite and the chemical modeling of iron in acid sulfate waters. *Geochim. Cosmochim. Acta* **60**, 2111-2121.
- Caraballo M. A., Rotting T. S., Nieto J. M., Ayora C. (2009) Sequential extraction and DXRD applicability to poorly crystalline Fe- and Al-phase characterization from an acid mine water passive remediation system. *Am. Mineral.* **94**, 1029-1038.
- Delany J. M., Lundeen S. R. (1990) The LLNL Thermochemical Database. Reportt UCRL-21658. Lawrence Livermore National Laboratory
- Dold B. (2003) Speciation of the most soluble phases in a sequential extraction procedure adapted for geochemical studies of copper sulfide mine waste. *J. Geochem. Explor.* **80**, 55-68.
- Gao X., Root R., Farrell J., Ela W., Chorover J. (2013) Effect of silicic acid on arsenate and arsenite retention mechanisms on 6-L ferrihydrite: A spectroscopic and batch adsorption approach. *Appl. Geochem.* **38**, 110-120.
- Hayes S. M., White S. A., Thompson T. L., Maier R. M., Chorover J. (2009) Changes in lead and zinc lability during weathering-induced acidification of desert mine tailings: Coupling chemical and micro-scale analyses. *Appl. Geochem.* **24**, 2234-2245.
- Janney, D. E., Cowley, J. M., Buseck, P. R. (2000) Transmission electron microscopy of synthetic 2-and 6-line ferrihydrite. *Clays Clay Miner.* **48**, 111-119.
- Majzlan J, Navrotsky A, Schwertmann U. (2004) Thermodynamics of iron oxides. III - Enthalpies of formation oand stability of ferrihydrite (Fe(OH)<sub>3</sub>), schwertmannite (FeO(OH)<sub>3/4</sub>(SO<sub>4</sub>)<sub>i/8</sub>), and Fe<sub>2</sub>O<sub>3</sub>. *Geochim. Cosmochim. Acta* **68**, 1049-1059.
- Manceau A., Gates W. P. (1997) Surface structural model for ferrihydrite. *Clay Clay Miner.* **45**, 448-460.
- Michel F. M., Ehm L., Antao S. M., Lee P. L., Chupas P. J., Liu G., Strongin D. R., Schoonen M. a. A., Phillips B. L., Parise J. B. (2007) The structure of ferrihydrite, a nanocrystalline material. *Science* **316**, 1726-1729.
- Neaman A, Mouele F, Trolard F, Bourrie G. (2004) Improved methods for selective dissolution of Mn oxides: applications for studying trace element associations. *Appl. Geochem.* **19**, 973-979.
- O'Day P. A., Rivera N., Root R., Carroll S. A. (2004) X-ray absorption spectroscopic study of Fe reference compounds for the analysis of natural sediments. *Am. Mineral.* **89**, 572-585.
- Root R. A., Vlassopoulos D., Rivera N. A., Rafferty M. T., Andrews C., O'day P. A. (2009) Speciation and natural attenuation of arsenic and iron in a tidally influenced shallow aquifer. *Geochim. Cosmochim. Acta* **73**, 5528-5553.
- Waychunas G. A., Rea B. A., Fuller C. C., Davis J. A. (1993) Surface-Chemistry of Ferrihydrite .1. EXAFS Studies of the Geometry of Coprecipitated and Adsorbed Arsenate. *Geochim. Cosmochim. Acta* **57**, 2251-2269.
- Zhao J. M., Huggins F. E., Feng Z., Huffman G. P. (1994) Ferrihydrite - Surface-structure and its effects on phase transformation. *Clays Clay Miner.* **42**, 737-746.

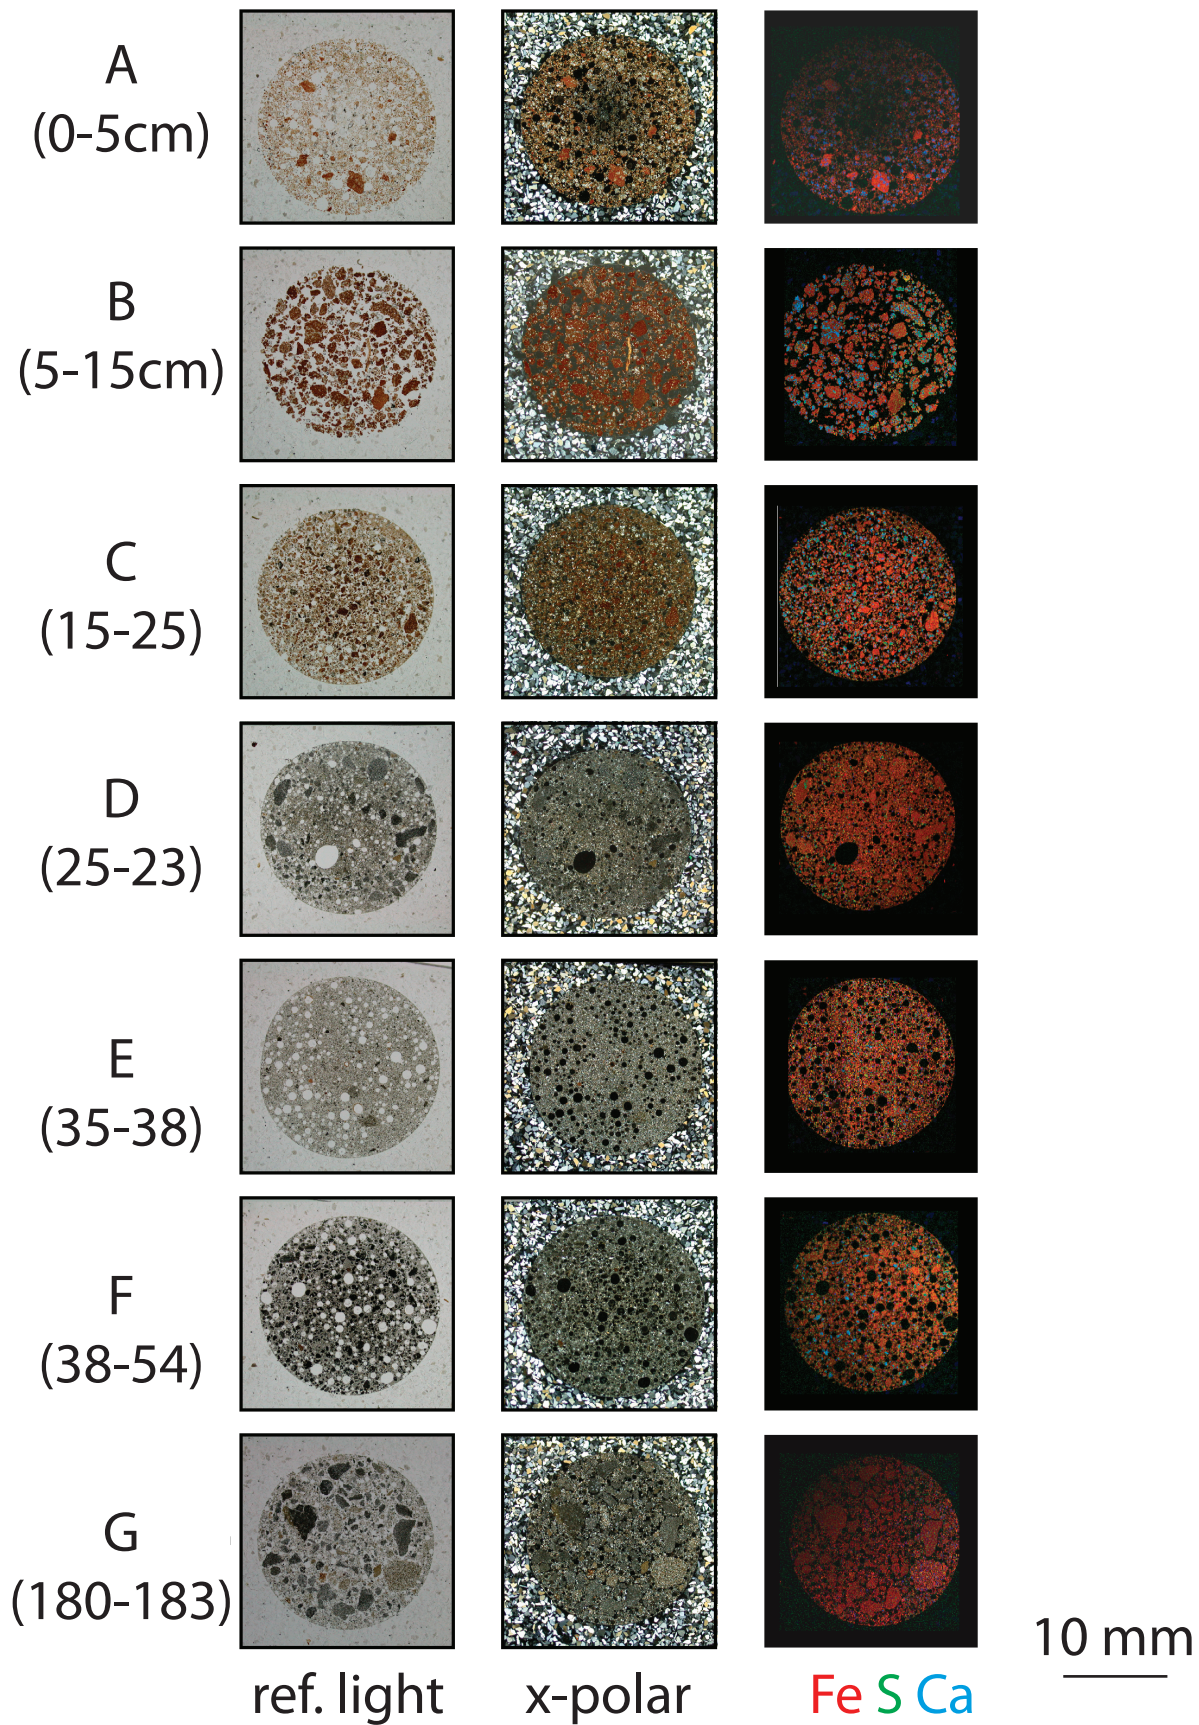

Figure SM1

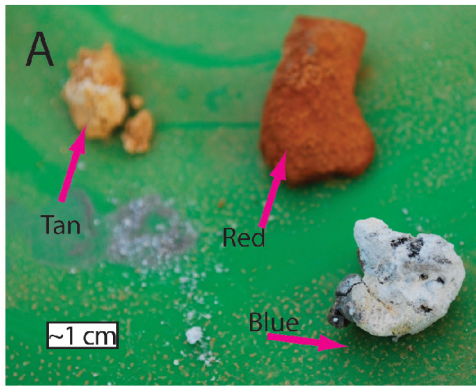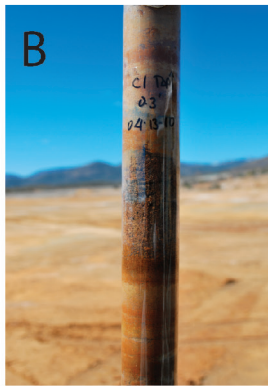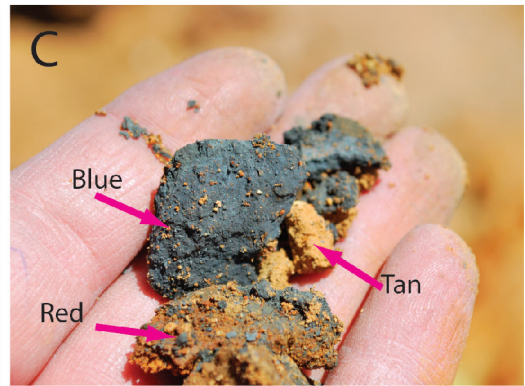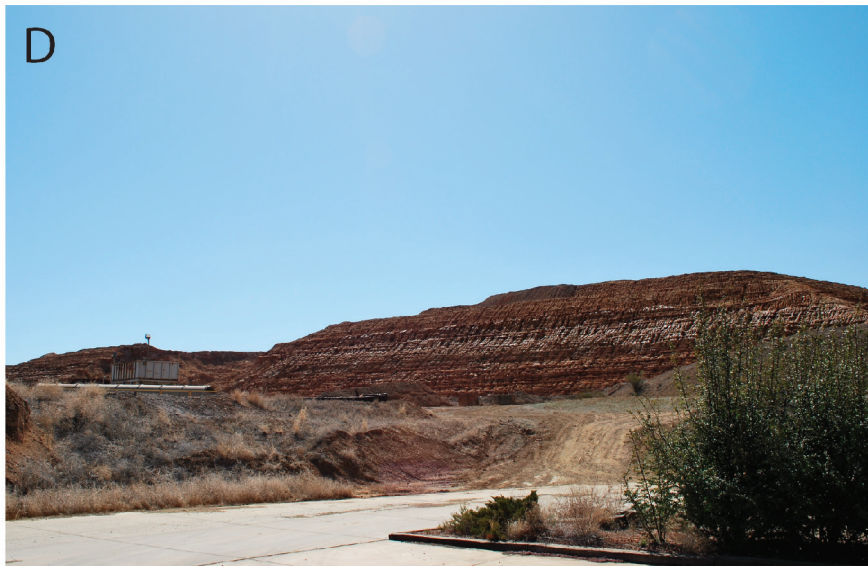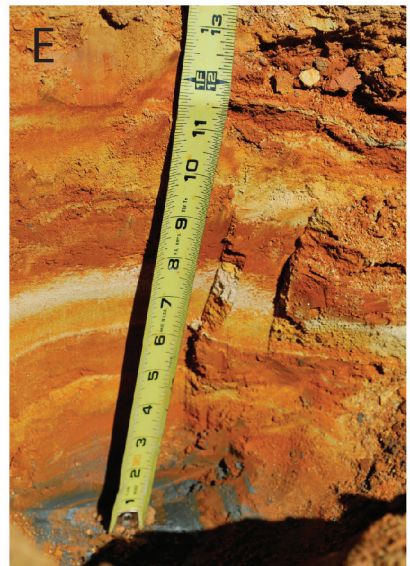

Figure SM2

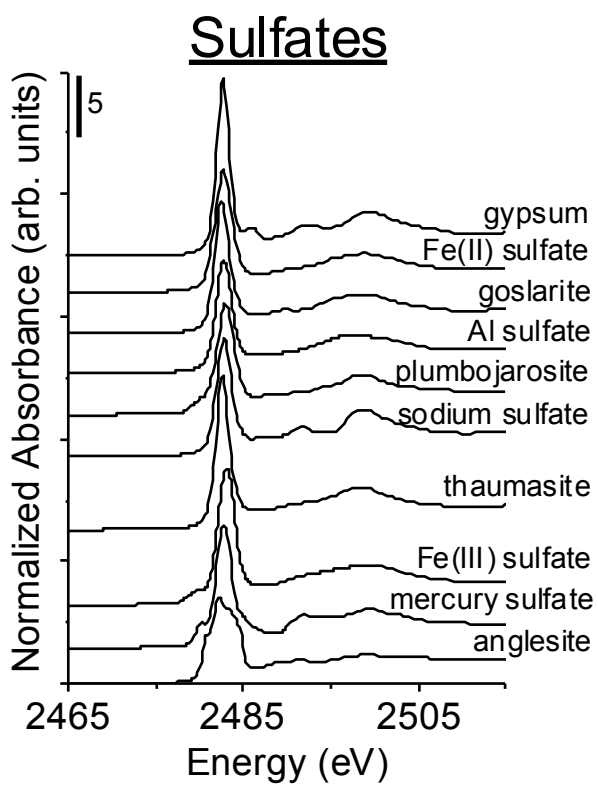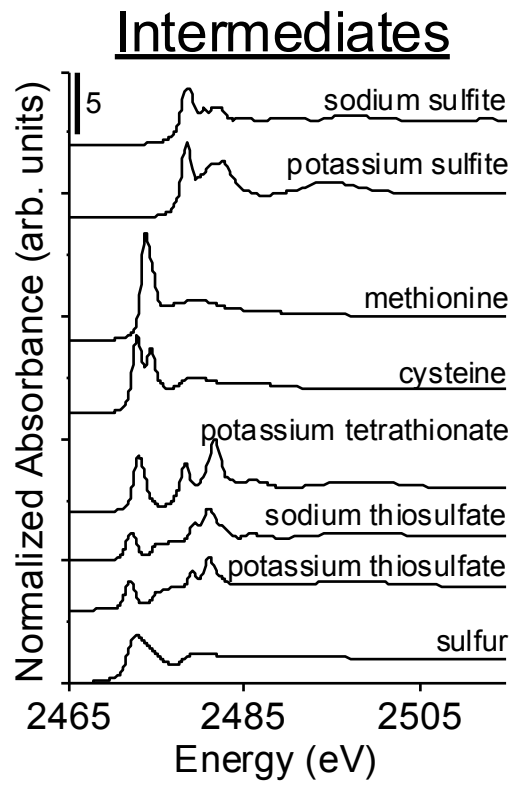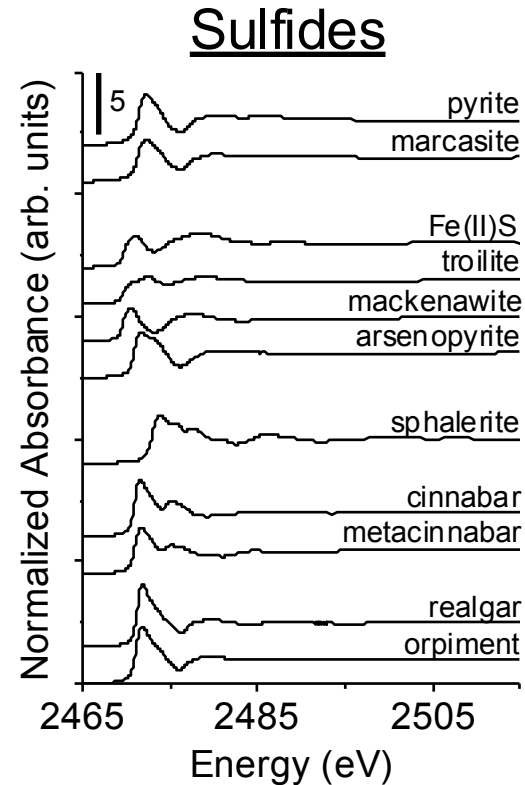

SM Figure 3

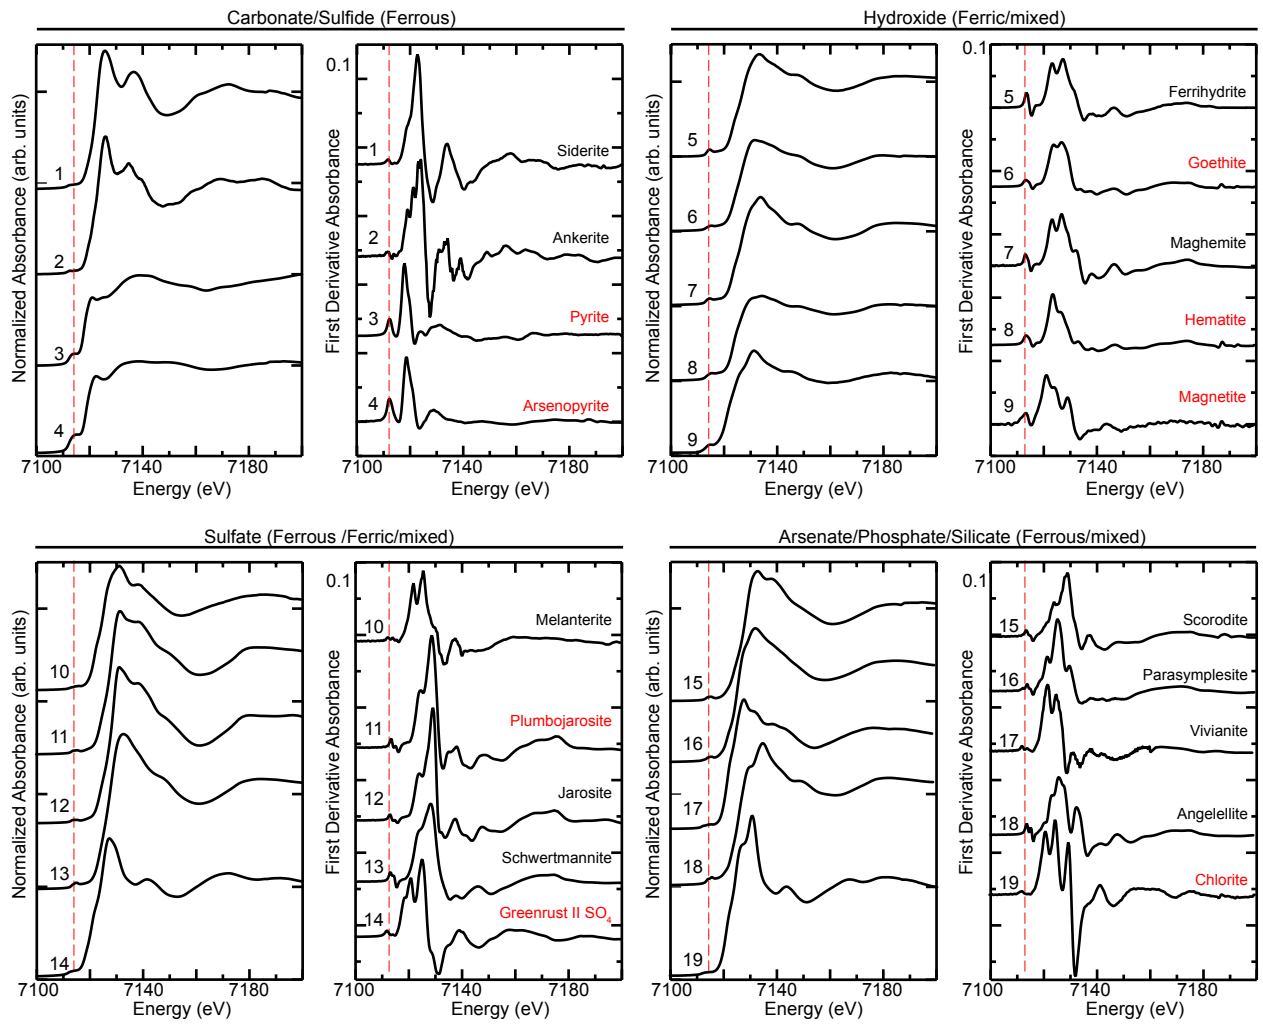

SM Figure &

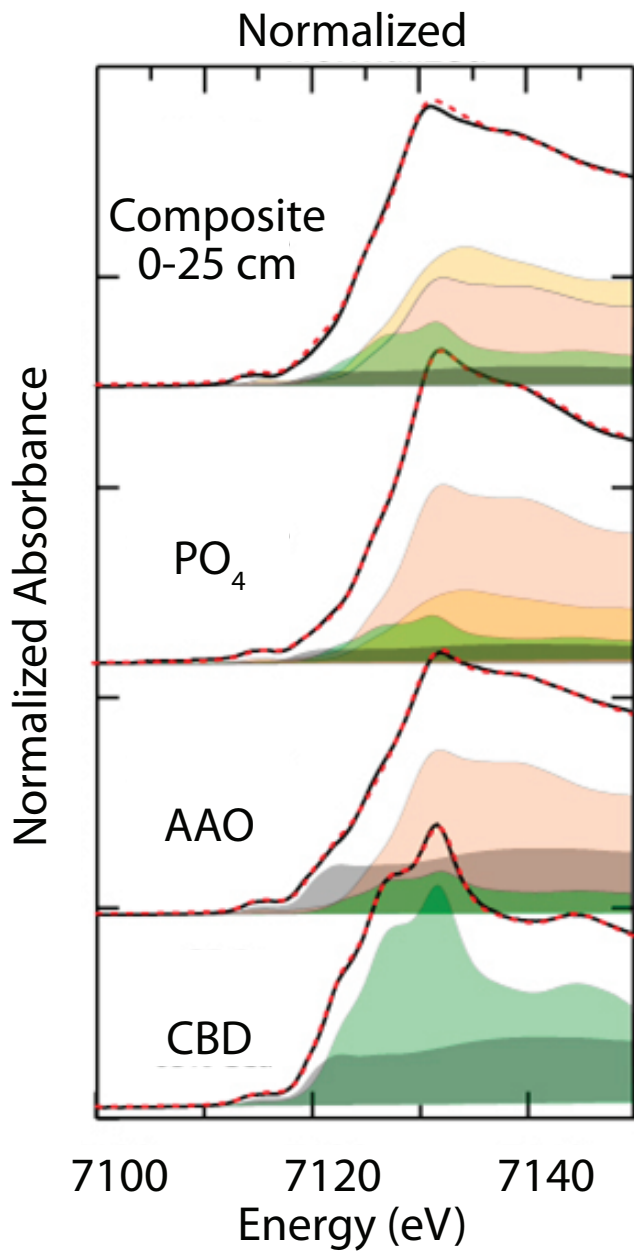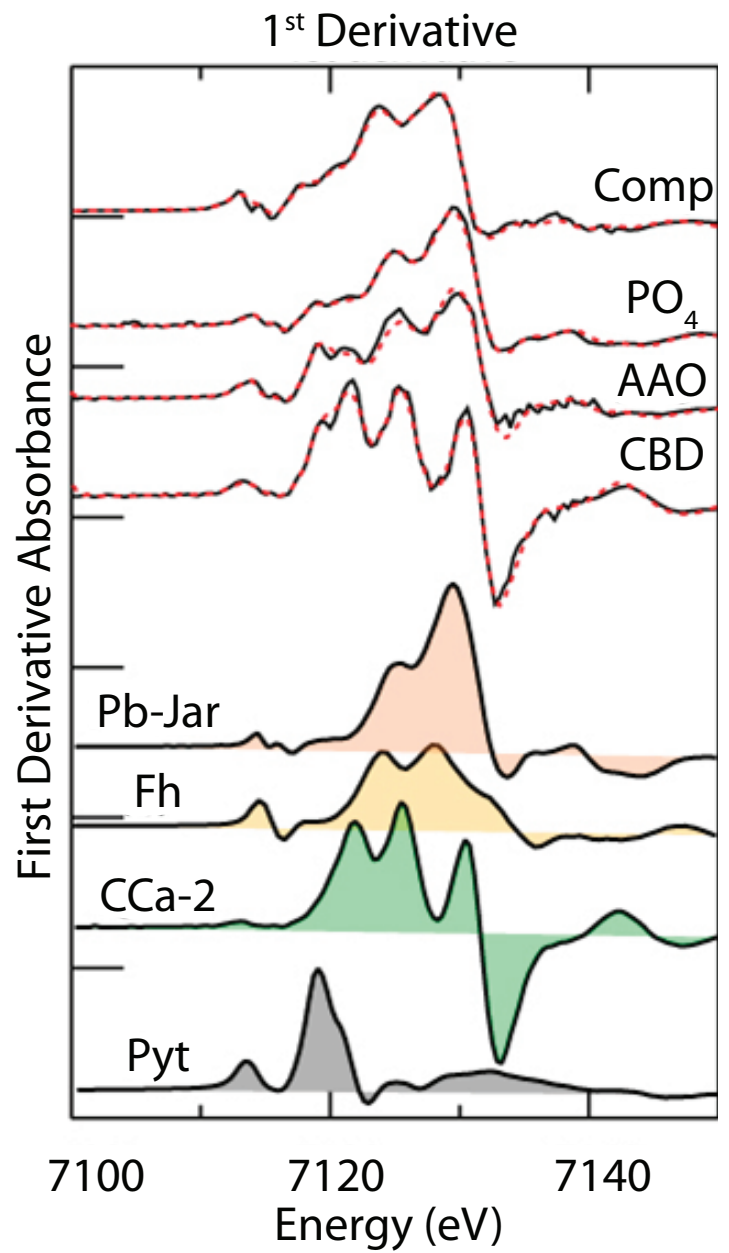

Figure SM5
