# Supplementary material
Source: PubMed Central journal article supplement (PMC4151187)
Supplement: NIHMS601936-supplement-02.pdf [file NIHMS601936-supplement-02.pdf]

## **Electronic Annex**

Surficial weathering of iron sulfide mine tailings under semi-arid climate

Sarah M. Hayes, Robert A. Root, Nicolas Perdrial, Raina Maier, and Jon Chorover\*

Department of Soil, Water and Environmental Science,

University of Arizona, Tucson, AZ 85721

Submitted to:

Geochimica et Cosmochimica Acta

\* Address correspondence to Jon Chorover, Department of Soil, Water and Environmental Science, University of Arizona, 1177 E 4<sup>th</sup> St, Shantz 429, Tucson, AZ 85721  
Telephone: +1 520-626-5635, Fax: 520-626-1647, E-mail: chorover@cals.arizona.edu

Pages: 14

**Table EA-1:** Reference minerals used in XANES linear combination fits, spectra in Figs. EA-3, EA-4.

**Table EA-2:** Thermodynamic constants and mode conditions for Eh pH diagram

**Figure EA-1:** Petrographic images of all samples

**Figure EA-2:** Additional information for as-collected samples.

**Figure EA-3:** Reference minerals used in S XANES linear combination fits

**Figure EA-4:** Reference minerals used in Fe XANES linear combination fits

**Figure EA-5:** First-derivative Fe- XANES fits for SSE samples

**Sequential Extraction Procedure**

The SSE procedure was modified after Dold (2003) and Neaman et al. (2004) and performed as follows: 1) deionized water ( $H_2O$ ), 1 h at room temperature ( $25^{\circ}C$ , RT), targeting soluble efflorescent salts, e.g. gypsum; 2) 1 M ammonium nitrate, 2h at RT with a DI wash targeting easily exchangeable and plant/bioavailable ions and metals; 3) 1M ammonium acetate with pH adjusted to 4.5 with acetic acid and a DI wash, targeting non-specifically sorbed ions and acid soluble carbonates; 4) 1.0M sodium phosphate ( $NaH_2PO_4$ ), 24 hr with pH adjusted to 5.0 with acetic acid and a DI wash, targeting specifically sorbed ligands, e.g. inner sphere As complexed on ferric (hydr)oxide surface sites; 5) 0.1 M ascorbic acid plus 0.2 M ammonium oxalate, 2 h in the dark at pH 3.0 adjusted with oxalic acid with an acetic acid wash to dissolve precipitated oxalates, targeting poorly crystalline Al, Mn, and Fe (oxyhydr)oxides, including ferrihydrite and schwertmannite; and 6) 1 M citrate-bicarbonate-dithionite with an acetic acid wash, targeting reducible crystalline Al, Mn, and Fe (oxyhydr)oxides and (hydroxy)sulfates, including goethite and jarosite. Sediment aliquots were sequentially treated with each extractant solution (solid: solution = 1:40 by mass), the suspensions were centrifuged (25 min at 11 000 g), and the supernatant was decanted and filtered (0.45  $\mu m$  nylon membrane filters). Between extraction steps, sediments were washed with 10 mL of deionized water (18.2  $M\Omega$ -cm), centrifuged, and the supernatant decanted. The filtrate from each extraction step was analyzed by ICP-MS. After these extractions were performed, the residual solids underwent elemental analysis after dissolution using lithium metaborate/tetraborate fusion with inductively coupled plasma optical emission mass spectrometry (ICP-OES). Averages are reported from extractions run in triplicate and compared to total concentrations from the total digestion of a split sample described above. Samples were sacrificed at each step in the SSE and kept frozen prior for analysis by x-ray diffraction (XRD) and Fe- XANES analysis.

## **Petrographic Analysis**

A split subsample of the <2 mm fraction was air dried under 5% H<sub>2</sub>/95% N<sub>2</sub> and embedded using degassed ultra-clean low-temperature set epoxy (EpoTek 301™). Uniform 30 μm thin sections were cut and ground under an anaerobic environment (Spectrum Petrographics Vancouver, WA). The epoxy-impregnated 30 μm thin sections were bonded to arsenic free quartz slides using cyanoacrylate adhesive (Superglue™). Each thin section was examined with a reflected and cross polarized light microscope. Distinct textural zones and grains of quartz and oxidized v. sulfide grains with and without oxidized rinds were identified in terms of color and morphology (reflected light). Petrographic analysis would have been complicated due to fine grain-size and poorly crystalline nature of the tailings. Electron and synchrotron microprobe (EMPA and u-XRF, respectively) were utilized to further characterize the petrology and elemental associations of the samples. For EMPA, thin sections were carbon coated and analyzed at the Lunar and Planetary Laboratory at the University of Arizona (CAMECA SX100 with WDS), operated at a 15 keV and a beam current of 9.77 nA and a spot size of about 2 μm. Synchrotron x-ray micro fluorescence (μ-XRF) was performed at SSRL. Thin sections further interrogated by micro-focused XRF maps and XAS spectra at the Stanford Synchrotron Radiation Lightsource (SSRL) at 13000 eV and 13050 eV (to differentiate As K-α from Pb L-III) using Si(111) crystal and a Vortex single element detector (SII Nano Technology, Northridge, CA) at beam lines 10-2 and 2-3 with a spot size of 30 μm and 2 μm, respectively.

## **SSE Fe-XANES Analysis**

The SSE-XANES spectra can be used to constrain model fits for complex and heterogeneous natural samples by uncovering phases that would otherwise be overlain and convoluted, making them potentially more difficult to identify. SSE-XANES, as used here without weight adjusted amplitude correction can be used to constrain and identify possible phases, but not the fractional component, used in linear combination fits after targeted phases are dissolved. The method is similar to differential x-ray diffraction can elucidate mineral Bragg reflections lost or gained as a function of reaction in a series of sequential extractions (Dold, 2003; Caraballo et al., 2009). Splits from the IK composite SSE series were examined before and after each SSE by Fe XANES. Examination of the residual revealed isolated phases as well as phases extracted and were used to guide the selection of component models in fits for the pit samples..

## **Geochemical Modeling**

Equilibrium activity diagrams depicting theoretical stability relations among solid phases and aqueous species were computed with the ACT2 program in GWB. Precipitation of the thermodynamically stable phases of hematite, goethite, and magnetite was suppressed in the model to show the metastable phases of ferrihydrite, schwertmannite, and jarosite. Modified database from the LLNL dataset thermo.com.V8.R6+ (Delany and Lundeen, 1990). There are disagreements in the literature on ferrihydrite structure (Waychunas et al., 1993; Zhao et al., 1994; Manceau and Gates, 1997; Janney et al., 2000; Michel et al., 2007), and solubility products (e.g.  $\log K_{sp} = 3.0$  to  $5.66$ ; Delany and Lundeen, 1990; Majzlan et al., 2004).

**Table EA-1:** Reference minerals used in XANES linear combination fits, spectra in EA-Figs. 3, 4.

| Mineral                    | Formula                                                                                               | Source                   | Lot/locality    | Reference                                          |
|----------------------------|-------------------------------------------------------------------------------------------------------|--------------------------|-----------------|----------------------------------------------------|
| angelellite                | $\text{Fe}^{\text{III}}_4(\text{AsO}_4)_2\text{O}_3$                                                  | Synthetic                |                 | Berdesinski, 1960                                  |
| anglesite                  | $\text{PbSO}_4$                                                                                       | Aldrich                  | 0731BE          | Hayes et al., 2012                                 |
| ankerite                   | $\text{Ca}(\text{Fe,Mg})(\text{CO}_3)_2$                                                              | R. Root collection       | Pulaski Co., AR |                                                    |
| arsenopyrite               | $\text{FeAsS}$                                                                                        | R. Root collection       | Ontario, Canada | O'Day et al., 2004a                                |
| chlorite                   | $(\text{Mg, Fe})_5\text{Al}(\text{Si}_3\text{Al})\text{O}_{10}(\text{OH})_8$                          | Clay Minerals Repository | CCa-2           | O'Day et al., 2004b                                |
| cinnabar                   | $\text{HgS}$                                                                                          | Acros Organic            | A0231622        |                                                    |
| cysteine                   | $\text{C}_3\text{H}_7\text{NO}_2\text{S}$                                                             | Fluka                    | 2130945         |                                                    |
| elemental sulfur           | S                                                                                                     | Sigma                    | 11325MI         |                                                    |
| ferrihydrite               | $\text{Fe}_2\text{O}_3 \cdot 2\text{FeOOH} \cdot 2.6\text{H}_2\text{O}$                               | Synthetic                |                 | Burleson and Penn, 2006; Gao et al., 2013          |
| goethite                   | $\alpha\text{-Fe}^{\text{III}}\text{OOH}$                                                             | Synthetic                |                 | Schwertmann and Cornell, 1991; O'Day et al., 2004b |
| goslarite                  | $\text{ZnSO}_4 \cdot 7\text{H}_2\text{O}$                                                             | Mallinckrodt             | V07616          |                                                    |
| greenrust II $\text{SO}_4$ | $\text{Fe}^{\text{II}}_4\text{Fe}^{\text{III}}_2(\text{OH})_2(\text{SO}_4) \cdot 6\text{H}_2\text{O}$ | Synthetic                |                 | Drissi, 1995; Root et al., 2009                    |
| gypsum                     | $\text{CaSO}_4 \cdot 2\text{H}_2\text{O}$                                                             | Wards Scientific         | Alberta, Canada |                                                    |
| hematite                   | $\alpha\text{-Fe}_2\text{O}_3$                                                                        | Synthetic                |                 | Schwertmann and Cornell 1991; O'Day et al., 2004   |

| Mineral            | Formula                                                                             | Source                     | Lot/locality                     | Reference                     |
|--------------------|-------------------------------------------------------------------------------------|----------------------------|----------------------------------|-------------------------------|
| iron (II) sulfate  | FeSO <sub>4</sub>                                                                   | Fisher Chemicals           | 040692                           |                               |
| iron (II) sulfide  | FeS                                                                                 | Acros Organics             | A0244179                         |                               |
| iron (III) sulfate | Fe <sub>2</sub> (SO <sub>4</sub> ) <sub>3</sub> • 7H <sub>2</sub> O                 | Aldrich                    | 05517TS                          |                               |
| jarosite           | KFe <sup>III</sup> <sub>3</sub> (SO <sub>4</sub> ) <sub>2</sub> (OH) <sub>6</sub>   | Synthetic                  | na                               | Driscoll et al., 2005         |
| maghemite          | γ-Fe <sub>2</sub> O <sub>3</sub>                                                    | R. Root Collection         | Sebkovice Moraiva,<br>Czech Rep. | O'Day et al., 2004b           |
| magnetite          | Fe <sup>II</sup> Fe <sup>III</sup> O <sub>4</sub>                                   | UCM Collection             | San Carlos, AZ                   | O'Day et al., 2004b           |
| marcasite          | FeS <sub>2</sub>                                                                    | Collection of L.<br>Garvie | Lagendorf<br>Hamburg,<br>Germany | O'Day et al., 2004b           |
| melanterite        | Fe(SO <sub>4</sub> )•7H <sub>2</sub> O                                              | Excalibur Mineral          |                                  |                               |
| mercury sulfate    | HgSO <sub>4</sub>                                                                   | Acros Organics             | A0234564                         |                               |
| methionine         | C <sub>5</sub> H <sub>11</sub> NO <sub>2</sub> S                                    | Sigma                      | 058H0123                         |                               |
| orpiment           | As <sub>2</sub> S <sub>3</sub>                                                      | Synthetic                  |                                  | Eary 1992; O'Day et al. 2004a |
| parasymphesite     | Fe <sup>III</sup> <sub>3</sub> (AsO <sub>4</sub> ) <sub>2</sub> • 8H <sub>2</sub> O | Synthetic                  | PDF# 00-035-<br>0461             | Lin and Puls, 2003            |
| plumbojarosite     | Pb(Fe <sub>3</sub> (SO <sub>4</sub> ) <sub>2</sub> (OH) <sub>6</sub> ) <sub>2</sub> | UA Mineral<br>Museum       | 5751                             | Hayes et al., 2009            |
| potassium sulfite  | K <sub>2</sub> SO <sub>3</sub>                                                      | Aldrich                    | 04702AH                          |                               |

| Mineral                 | Formula                         | Source                | Lot/locality              | Reference           |
|-------------------------|---------------------------------|-----------------------|---------------------------|---------------------|
| potassium tetrathionate | $K_2S_4O_6$                     | Fluka                 | 1157107<br>51706290       |                     |
| potassium thiosulfate   | $K_2S_2O_3$                     | Aldrich               | 11629TD                   |                     |
| pyrite                  | $FeS_2$                         | Wards Scientific      | unknown                   | O'Day et al., 2004b |
| realgar                 | $\alpha-As_4S_4$                | UCM collection        |                           | O'Day et al., 2004b |
| schwertmannite          | $Fe_8O_8(OH)_6(SO_4)$           | Synthetic             |                           | Bigham et al., 1990 |
| scorodite               | $Fe^{II}AsO_4 \cdot 2H_2O$      | UCM collection        | Goldhill, Utah            |                     |
| siderite                | $Fe^{II}CO_3$                   | UCM collection        | Chihuahua, Mexico         | O'Day et al., 2004b |
| sodium sulfate          | $Na_2SO_4$                      | Sigma                 | 117k0004                  |                     |
| sodium sulfite          | $Na_2SO_3$                      | Sigma                 | S-8018                    |                     |
| sodium thiosulfate      | $Na_2S_2O_3$                    | J. T. Baker           | 2946-1                    |                     |
| sphalerite              | $ZnS$                           | Wards Scientific      | Picos de Europa,<br>Spain |                     |
| troilite                | $FeS$                           | UCM collection        |                           |                     |
| vivianite               | $Fe^{II}_3(PO_4)_2 \cdot 8H_2O$ | Amethyst<br>Galleries | Kerch, Ukraine            |                     |

**Table EA-2:** Thermodynamic constants and mode conditions for Eh pH diagram

|                                                                                                                                                             |                       |
|-------------------------------------------------------------------------------------------------------------------------------------------------------------|-----------------------|
| Iron solid                                                                                                                                                  | log K                 |
| Jarosite [Fe <sub>3</sub> (SO <sub>4</sub> ) <sub>2</sub> (OH) <sub>6</sub> ]                                                                               | 9.37 <sup>a</sup>     |
| $3\text{Fe}^{3+} + 2\text{SO}_4^{2-} + \text{K}^+ + 6\text{H}_2\text{O} \Leftrightarrow \text{Fe}_3(\text{SO}_4)_2(\text{OH})_6 + 6\text{H}^+$              |                       |
| Schwertmannite [Fe <sub>8</sub> O <sub>8</sub> (OH) <sub>4.8</sub> (SO <sub>4</sub> ) <sub>1.6</sub> ]                                                      | 17.4 <sup>b</sup>     |
| $8\text{Fe}^{3+} + 12.8\text{H}_2\text{O} + 1.6\text{SO}_4^{2-} \Leftrightarrow \text{Fe}_8\text{O}_8(\text{OH})_{4.8}(\text{SO}_4)_{1.6} + 20.8\text{H}^+$ |                       |
| Ferrihydrite [Fe(OH) <sub>3</sub> ]                                                                                                                         |                       |
| $\text{Fe}^{3+} + \text{H}_2\text{O} \Leftrightarrow \text{Fe}(\text{OH})_3 + 3\text{H}^+$                                                                  |                       |
|                                                                                                                                                             | -3.0 <sup>c</sup>     |
| $\text{Fe}^{3+} + \text{H}_2\text{O} \Leftrightarrow \text{Fe}(\text{OH})_3 + 3\text{H}^+$                                                                  |                       |
|                                                                                                                                                             | -5.56 <sup>a</sup>    |
| Pyrite [FeS <sub>2</sub> ]                                                                                                                                  | -24.65 <sup>a,d</sup> |
| $\text{Fe}^{2+} + 0.25\text{SO}_4^{2-} + 1.75\text{HS}^- + 0.25\text{H}^+ \Leftrightarrow \text{FeS}_2 + \text{H}_2\text{O}$                                |                       |

---

<sup>a</sup> Delaney and Lundeen, 1990; <sup>b</sup> Bigham et al., 1996; <sup>c</sup> Majzlan et al, 2004; <sup>d</sup> Lundeen, 1990



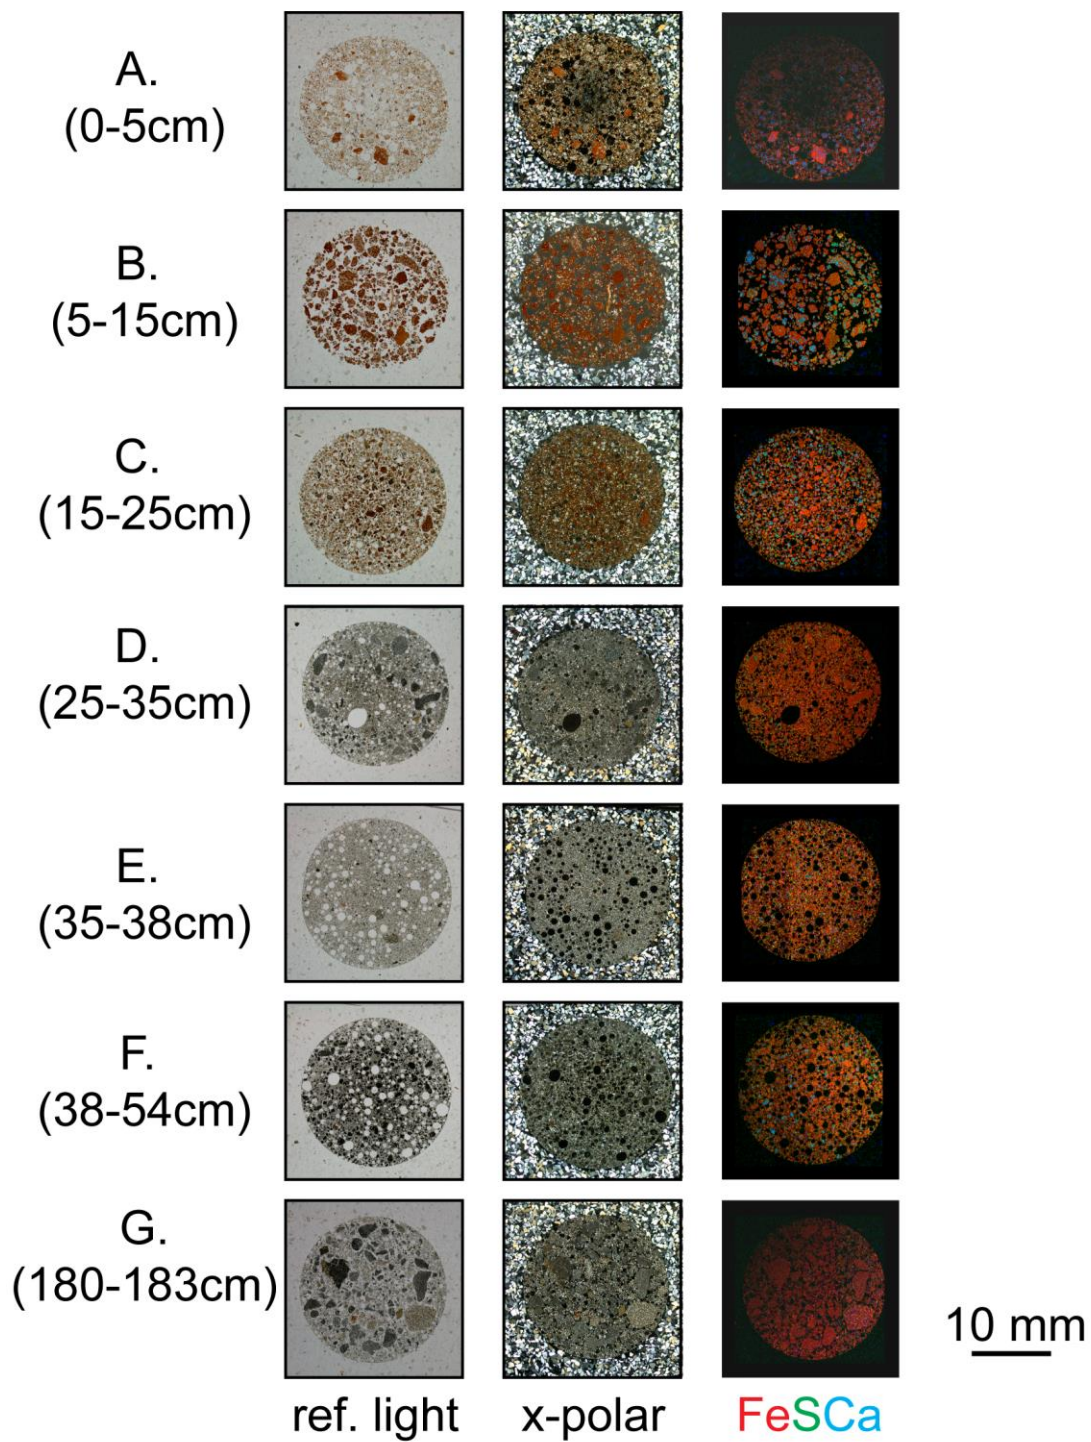

**Figure EA-1:** Petrographic images of all samples. Images from reflected light, cross polarized light and x-ray fluorescence (13000 & 13050eV) from 30  $\mu$ m thin sections for each depth (A-G) from the IK mine tailings.

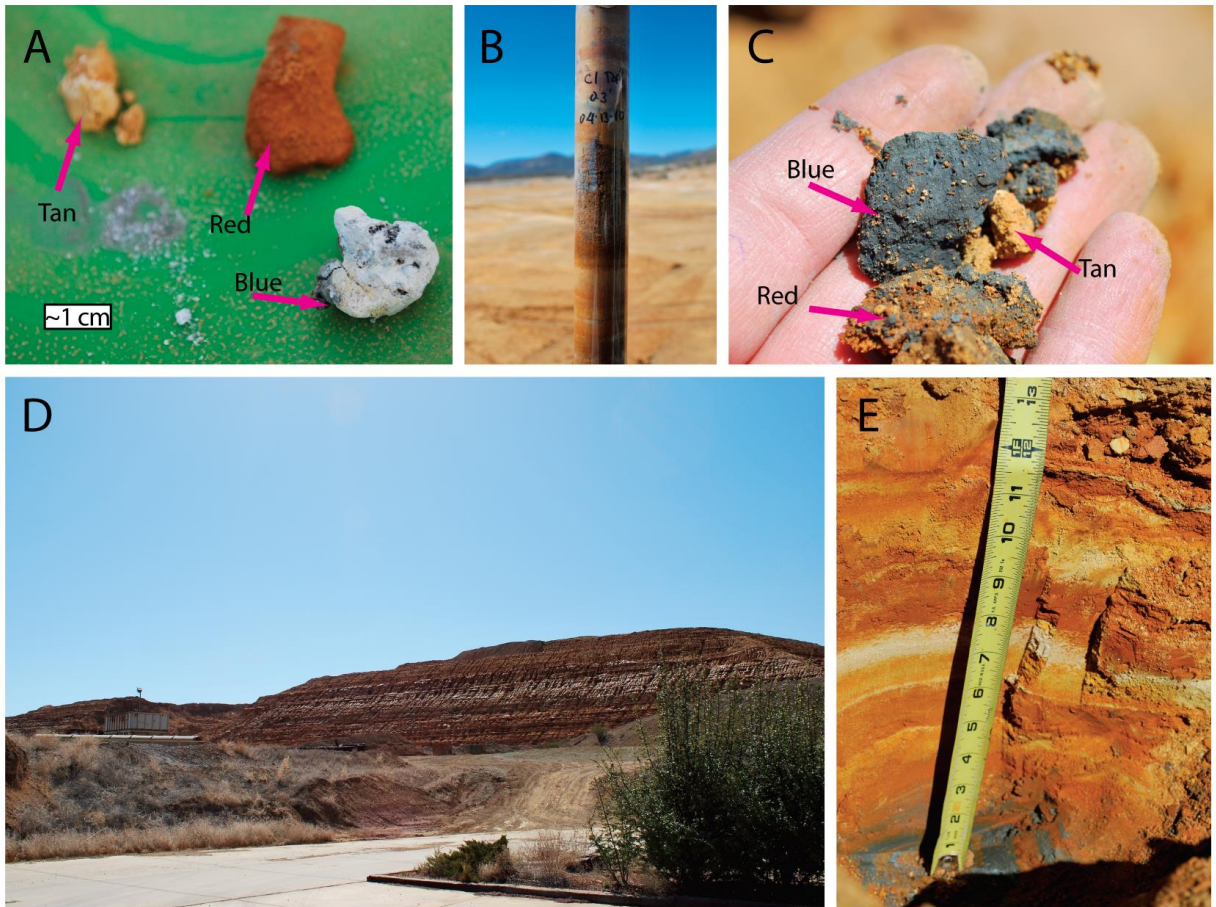

**Figure EA-2:** Additional information for as-collected samples. Isolated grains were examined based on color and morphology. Panels A-C show the three distinct aggregates observed in the surface tailings, identified as tan, red and blue. Panel D shows the tailings pile observed from the buildings labeled in Fig. 1 with a view to the west toward the pit on top of the pile. Panel E shows the color changes observed in the fresh pit (scale shown in inches).

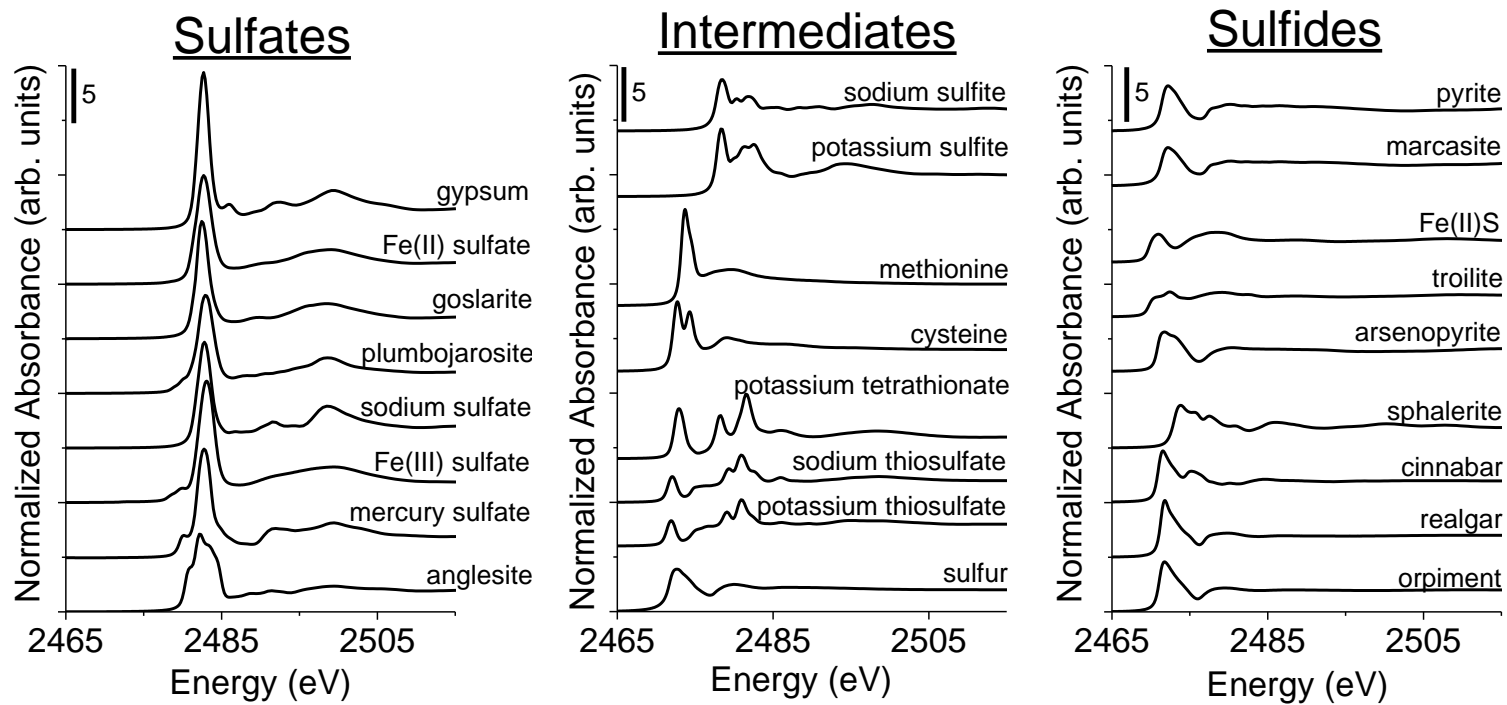

**Figure EA-3:** Reference minerals used in S XANES linear combination fits

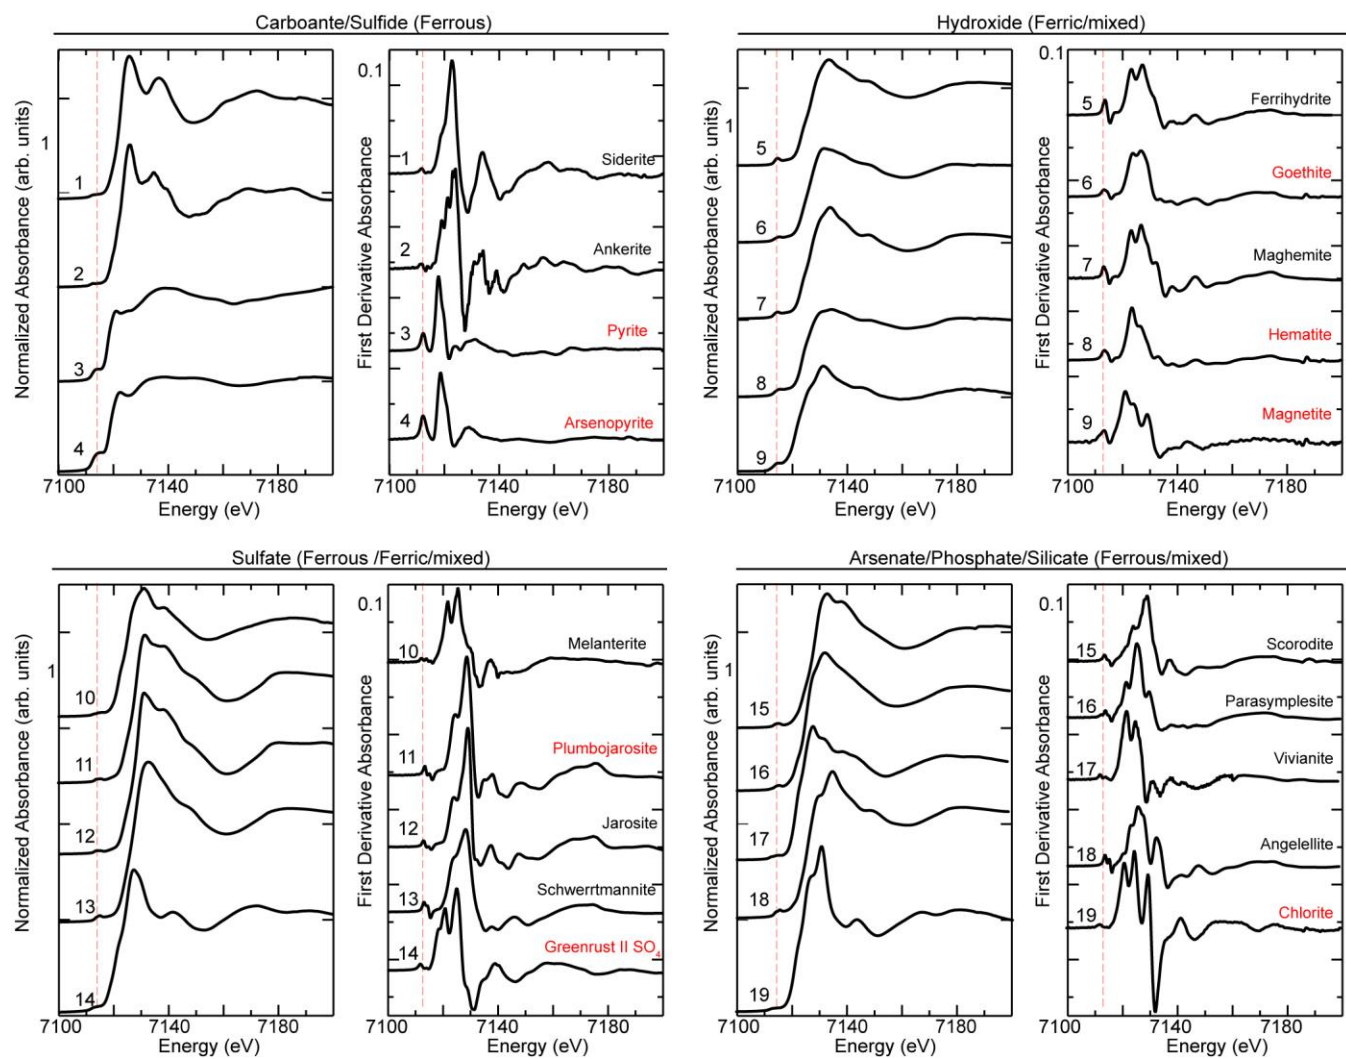

**Figure EA-4:** Reference minerals used in Fe XANES linear combination fits. Red spectra labels indicate spectra that have been published previously (Hayes et al., 2009; O'Day et al., 2004).

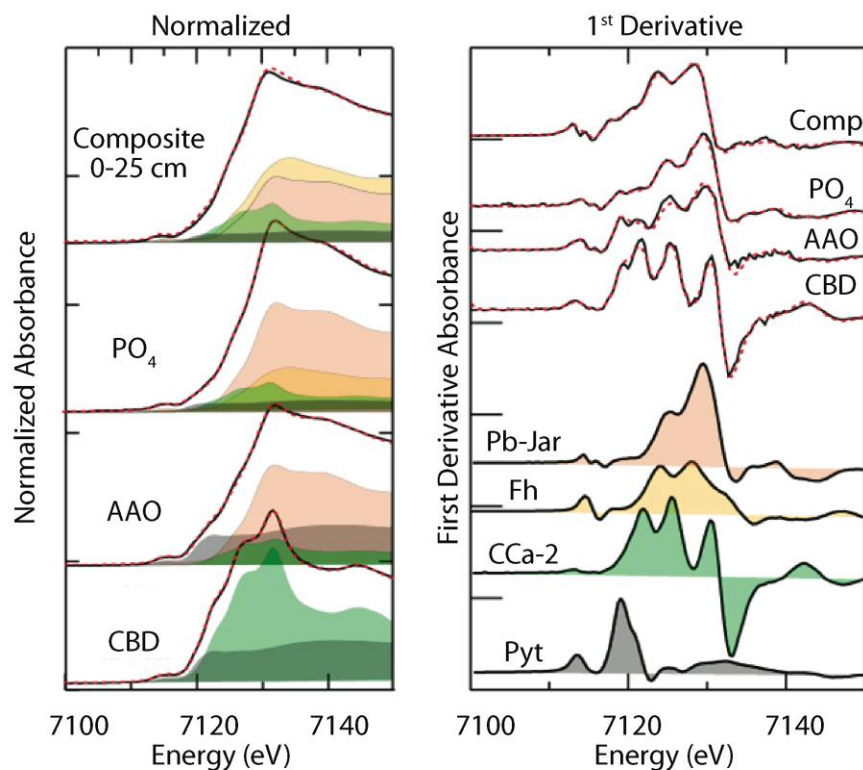

**Figure EA-5:** First-derivative Fe- XANES fits for SSE samples.

## References

- Berdesinski, W. W. (1960) Synthesis of angelellite,  $(\text{Fe}_4(\text{AsO}_4)_2)_3$ . *Neues Jahrb. Miner. Abh.* **94**, 1203-1208.
- Bigham J. M., Schwertmann U., Carlson L., Murad E. (1990) A Poorly Crystallized Oxyhydroxysulfate of Iron Formed by Bacterial Oxidation of Fe(ii) in Acid-Mine Waters. *Geochim. Cosmochim. Acta* **54**, 2743-2758.
- Bigham J.M., Schwertmann U., Traina S.J., Winland R.L., Wolf M. (1996) Schwertmannite and the chemical modeling of iron in acid sulfate waters. *Geochim. Cosmochim. Acta* **60**, 2111-2121.
- Burleson D.J., Penn R.L. (2006) Two-step growth of goethite from ferrihydrite. *Langmuir* **22**, 402-409.
- Caraballo M. A., Rotting T. S., Nieto J. M., Ayora C. (2009) Sequential extraction and DXRD applicability to poorly crystalline Fe- and Al-phase characterization from an acid mine water passive remediation system. *Am. Mineral.* **94**, 1029-1038.
- Delany J. M., Lundeen S. R. (1990) The LLNL Thermochemical Database. Report UCRL-21658. Lawrence Livermore National Laboratory
- Dold B. (2003) Speciation of the most soluble phases in a sequential extraction procedure adapted for geochemical studies of copper sulfide mine waste. *J. Geochem. Explor.* **80**, 55-68.
- Driscoll R. L., Leinz R. W. (2005) Methods for synthesis of some jarosites. *USGS Techniques and Methods 5-D1*.

- Drissi S. H., Refait P., Abdelmoula M., and Génin J. M. R. (1995) The preparation and thermodynamic properties of Fe(II)-Fe(III) hydroxide-carbonate (green rust 1); Pourbaix diagram of iron in carbonate-containing aqueous media. *Corros. Sci.* **37**, 2025-2041.
- Eary, L. E. (1992) The solubility of amorphous As<sub>2</sub>S<sub>3</sub> from 25 to 90 °C. *Geochim. Cosmochim. Acta* **56**, 2267-2280.
- Gao X., Root R. A., Farrell J., Ela W., Chorover J. (2013) Effect of silicic acid on arsenate and arsenite retention mechanisms on 6-L ferrihydrite: A spectroscopic and batch adsorption approach. *Appl. Geochem.* **38**, 110-120.
- Hayes S. M., White S. A., Thompson T. L., Maier R. M., Chorover J. (2009) Changes in lead and zinc lability during weathering-induced acidification of desert mine tailings: Coupling chemical and micro-scale analyses. *Appl. Geochem.* **24**, 2234-2245.
- Hayes S. M., Webb S. M., Bargar J. R., O'Day P. A., Maier R. M., and Chorover, J. (2012) Geochemical Weathering Increases Lead Bioaccessibility in Semi-Arid Mine Tailings. *Env. Sci. Technol.* **46**, 5834-5841.
- Janney, D. E., Cowley, J. M., Buseck, P. R. (2000) Transmission electron microscopy of synthetic 2- and 6-line ferrihydrite. *Clay Clay Min.* **48**, 111-119
- Lin Z., Puls, R. W. (2003) Potential indicators for the assessment of arsenic natural attenuation in the subsurface. *Adv. Environ. Res.* **7**, 825-834.
- Majzlan J, Navrotsky A, Schwertmann U. (2004) Thermodynamics of iron oxides. III - Enthalpies of formation and stability of ferrihydrite (Fe(OH)<sub>3</sub>), schwertmannite (FeO(OH)<sub>3/4</sub>(SO<sub>4</sub>)<sub>i/8</sub>), and Fe<sub>2</sub>O<sub>3</sub>. *Geochim. Cosmochim. Acta* **68**, 1049-1059.
- Manceau A., Gates W. P. (1997) Surface structural model for ferrihydrite. *Clay Clay Min.* **45**, 448-460.
- Michel F. M., Ehm L., Antao S. M., Lee P. L., Chupas P. J., Liu G., Strongin D. R., Schoonen M. a. A., Phillips B. L., Parise J. B. (2007) The structure of ferrihydrite, a nanocrystalline material. *Science* **316**, 1726-1729.
- Neaman A, Mouele F, Trolard F, Bourrie G. (2004) Improved methods for selective dissolution of Mn oxides: applications for studying trace element associations. *Appl. Geochem.* **19**, 973-979.
- O'Day P. A., Rivera N., Root R., Carroll S. A. (2004a) X-ray absorption spectroscopic study of Fe reference compounds for the analysis of natural sediments. *Am. Mineral.* **89**, 572-585.
- O'Day P. A., Vlassopoulos D., Root R. A., Rivera N. (2004b) The influence of sulfur and iron on dissolved arsenic concentrations in the shallow subsurface under changing redox conditions. *Proc. Natl. Acad. Sci. U.S.A.* **101**, 13703-13708.
- Root R. A., Vlassopoulos D., Rivera N. A., Rafferty M. T., Andrews C., O'Day P. A. (2009) Speciation and natural attenuation of arsenic and iron in a tidally influenced shallow aquifer. *Geochim. Cosmochim. Acta* **73**, 5528-5553.
- Schwertmann U., Cornell R. M. (2000) *Iron Oxides in the Laboratory: preparation and characterization*. Wiley-VCH Verlag, New York.
- Waychunas G. A., Rea B. A., Fuller C. C., Davis J. A. (1993) Surface-Chemistry of Ferrihydrite .1. EXAFS Studies of the Geometry of Coprecipitated and Adsorbed Arsenate. *Geochim Cosmochim Acta* **57**, 2251-2269.
- Zhao J. M., Huggins F. E., Feng Z., Huffman G. P. (1994) Ferrihydrite - Surface-structure and its effects on phase transformation. *Clay Clay Min.* **42**, 737-746.
